# Supplementary material for: Nitzschia anatoliensis sp. nov., a cryptic diatom species from the highly alkaline Van Lake (Turkey)
Source: PeerJ. 2021 Oct 22;9:e12220. doi: 10.7717/peerj.12220 (PMC8544256; doi:10.7717/peerj.12220)
Supplement: Supplemental Information 4 — The lengths and widths measured on LM and SEM pictures and the striae and fibulae measured on SEM pictures. [file peerj-09-12220-s004.xlsx]

## Sheet: Sayfa1
	Sample no	Length	Width	Striae	Fibulae
LM image	1	16.3	2.9
LM image	2	15.8	2.6
LM image	3	15.7	3.2
LM image	4	15.5	2.9
LM image	5	15.2	2.8
LM image	6	15.2	3
LM image	7	15.2	3.1
LM image	8	14.6	2.7
LM image	9	14	3.1
LM image	10	13.9	3
LM image	11	13.3	2.8
LM image	12	13	3.6
LM image	13	12.6	3
LM image	14	13.4	3.5
LM image	15	13.4	3.4
LM image	16	13.1	3.6
LM image	17	12.8	3.6
LM image	18	13.1	3.1
LM image	19	12.5	3.6
LM image	20	12.9	3.4
LM image	21	13	3.5
LM image	22	13.1	3.3
LM image	23	12.8	3.5
LM image	24	12.8	3.1
LM image	26	13.1	2.9
LM image	27	13.2	3.5
LM image	28	13.2	3.4
LM image	29	13.3	3.3
LM image	30	13	3.2
LM image	31	12.7	3.5
LM image	32	13.4	3.6
LM image	33	13.1	3.3
LM image	34	13.6	3.6
LM image	35	13.5	3.7
LM image	36	13.6	2.9
LM image	37	13.5	2.8
LM image	38	13.7	2.9
LM image	39	13.4	3
LM image	40	13.5	3.1
LM image	41	13.1	3
LM image	42	13.4	3.2
LM image	43	13	3.4
LM image	44	12.9	2.9
LM image	45	12.8	2.6
LM image	46	13.2	2.8
LM image	47	12.7	2.9
LM image	48	12.8	3
SEM image	49	12.9	3	50	20
SEM image	50	12.4	3.5	49	21
SEM image	51	12.7	2.6	48	22
SEM image	52	12.8	3.4	50	20
SEM image	53	12.8	3.2	52	22
SEM image	54	12.8	3.1	51	20
